# Supplementary material for: Gene Expression and Chondrogenic Potential of Cartilage Cells: Osteoarthritis Grade Differences
Source: MDPI journal article supplement (doi:10.3390/ijms231810610), 2022-09-13
Supplement: s1 [file s1]

**Table S1.** Statistical differences in the expression of MPC, chondrocyte and hypertrophic chondrocyte markers between BM - MSC commercial cell line and OA grades (Mild, Moderate, Severe).

| Markers                                 | BM-MSC vs. Mild | BM-MSC vs. Moderate | BM-MSC vs. Severe | Mild vs. Moderate | Mild vs. Severe | Moderate vs. Severe |
|-----------------------------------------|-----------------|---------------------|-------------------|-------------------|-----------------|---------------------|
| <b>MPC markers</b>                      |                 |                     |                   |                   |                 |                     |
| CD105                                   | ns              | ns                  | p= 0.0105, *      | ns                | Ns              | p= 0.0245, *        |
| CD166                                   | p= 0.0480, *    | p= 0.0037, **       | p= 0.0014, **     | ns                | Ns              | ns                  |
| Notch – 1                               | ns              | p= 0.0417, *        | ns                | ns                | Ns              | ns                  |
| Sox – 9                                 | p= 0.0043, **   | p= 0.0010, **       | p= 0.0015, **     | p= 0.0106 **↑     | p= 0.0041, **↑  | ns                  |
| <b>Chondrocyte markers</b>              |                 |                     |                   |                   |                 |                     |
| Col II                                  | p= 0.0238, *    | p= 0.0081, **       | p= 0.0077, **     | ns                | Ns              | ns                  |
| Acan                                    | p= 0.0025, **   | p= 0.0010, **       | p= 0.0009, ***    | ns                | Ns              | p= 0.0282, *        |
| <b>Hypertrophic chondrocyte markers</b> |                 |                     |                   |                   |                 |                     |
| Col I                                   | ns              | ns                  | ns                | ns                | Ns              | ns                  |
| MMP13                                   | p= 0.0095, **   | p= 0.0032, **       | p= 0.0032, **     | ns                | Ns              | ns                  |
| ALPL                                    | p= 0.0101, *    | p= 0.0081, **       | p= 0.0056, **     | ns                | Ns              | ns                  |

**Table S2.** Statistical differences in the expression of MPC, chondrocyte and hypertrophic chondrocyte markers in between D0 and D14 in mild OA derived cells.

| <b>MILD OA</b>                         |               |              |               |
|----------------------------------------|---------------|--------------|---------------|
| Markers                                | D0 vs. D14    | D0 vs. D35   | D14 vs. D35   |
| <b>MPC markers</b>                     |               |              |               |
| CD105                                  | p= 0.0079, ** | ns           | p= 0.0079, ** |
| CD166                                  | p= 0.0079, ** | ns           | p= 0.0079, ** |
| Notch – 1                              | p= 0.0159, *  | ns           | p= 0.0079, ** |
| Sox – 9                                | p= 0.0357, *  | ns           | p= 0.0159, *  |
| <b>Chondrocyte markers</b>             |               |              |               |
| Col II                                 | ns            | p= 0.0357, * | p= 0.0317, *  |
| Acan                                   | p= 0.0159, *  | p= 0.0159, * | p= 0.0159, *  |
| <b>Hypertrophic chondrocyte marker</b> |               |              |               |
| Col I                                  | ns            | ns           | ns            |

**Table S3.** Statistical differences in the expression of MPC, chondrocyte and hypertrophic chondrocyte markers in between D0 and D14 in moderate OA derived cells.

| <b>MODERATE OA</b>                     |                   |                           |                           |
|----------------------------------------|-------------------|---------------------------|---------------------------|
| <b>Markers</b>                         | <b>D0 vs. D14</b> | <b>D0 vs. D35</b>         | <b>D14 vs. D35</b>        |
| <b>MPC markers</b>                     |                   |                           |                           |
| CD105                                  | p= 0.0002, ***    | p= 0.0159, *              | p< 0.0001, ** *           |
| CD166                                  | p < 0.0001, ***   | p < 0.0001, ***           | p= 0.0002, ** *           |
| Notch – 1                              | p < 0.0001, ***   | p < 0.0001, ***           | p= 0.0494, *              |
| Sox – 9                                | ns                | ns                        | p= 0.0098, **             |
| <b>Chondrocyte markers</b>             |                   |                           |                           |
| Col II                                 | p = 0.0003, ***   | p= 0.0391, *              | p< 0.0001, ** *           |
| Acan                                   | ns                | p= 0.0146, *              | p= 0.0186, *              |
| <b>Hypertrophic chondrocyte marker</b> |                   |                           |                           |
| Col I                                  | ns                | <b>p &lt; 0.0001, ***</b> | <b>p &lt; 0.0001, ***</b> |

**Table S4.** Statistical differences in the expression of MPC, chondrocyte and hypertrophic chondrocyte markers in between D0 and D14 in severe OA derived cells.

| <b>SEVERE OA</b>                       |                   |                   |                    |
|----------------------------------------|-------------------|-------------------|--------------------|
| <b>Markers</b>                         | <b>D0 vs. D14</b> | <b>D0 vs. D35</b> | <b>D14 vs. D35</b> |
| <b>MSC markers</b>                     |                   |                   |                    |
| CD105                                  | p= 0.0005, ***    | ns                | p= 0.0008, ** *    |
| CD166                                  | p= 0.0028, **     | p= 0.0002, ***    | p= 0.0076, **      |
| Notch – 1                              | ns                | ns                | p< 0.0001, ** *    |
| Sox – 9                                | ns                | ns                | ns                 |
| <b>Chondrocyte markers</b>             |                   |                   |                    |
| Col II                                 | p < 0.0001, ***   | p= 0.0004, ***    | ns                 |
| Acan                                   | p < 0.0001, ***   | p < 0.0001, ***   | p= 0.0455, *       |
| <b>Hypertrophic chondrocyte marker</b> |                   |                   |                    |
| Col I                                  | ns                | ns                | <b>ns</b>          |
